# Supplementary material for: Aluminum dendrite suppression by graphite coated anodes of Al-metal batteries
Source: Royal Society of Chemistry journal article supplement (doi:10.1039/d3ta02404k), 2023-01-01
Supplement: d3ta02404k1.pdf [file d3ta02404k1.pdf]

## Supporting Information

### **Aluminum Dendrites Suppression by Graphite Coated Anode of Al-Metal Battery**

Shiman He<sup>†a,b</sup>, Jie Wang<sup>†a</sup>, Xu Zhang<sup>a,\*</sup>, Weiqin Chu<sup>a</sup>, Shu Zhao<sup>a</sup>, Daping He<sup>c</sup>, Min Zhu<sup>b,\*</sup>  
and Haijun Yu<sup>a,\*</sup>

<sup>a</sup>Institute of Advanced Battery Materials and Devices, Key Laboratory of Advanced Functional Materials, Ministry of Education, Faculty of Materials and Manufacturing, Beijing University of Technology, Beijing, 100124, P. R. China

<sup>b</sup>Guangdong Provincial Key Laboratory of Advanced Energy Storage Materials, School of Materials Science and Engineering, South China University of Technology, Guangzhou, 510640, China

<sup>c</sup>Hubei Engineering Research Center of RF-Microwave Technology and Application, Wuhan University of Technology, Wuhan, 430070, China

\* Corresponding authors.

E-mail: [hj-yu@bjut.edu.cn](mailto:hj-yu@bjut.edu.cn) (H. Yu), [memzhu@scut.edu.cn](mailto:memzhu@scut.edu.cn) (M. Zhu), [zhangx@bjut.edu.cn](mailto:zhangx@bjut.edu.cn) (X. Zhang)

<sup>†</sup>These authors contributed equally to this work.

**Table S1.** The electrochemical performances of the state-of-the-art Al anodes and Al-g anode in ILs based electrolyte.

| Electrode                                  | Cell type  | Overpotential (mV) | Current density (mA cm <sup>-2</sup> ) | Cycling     | CEs                                                                  | Ref       |
|--------------------------------------------|------------|--------------------|----------------------------------------|-------------|----------------------------------------------------------------------|-----------|
| 3D Al anode                                | Symmetric  | 170                | 0.5                                    | 450 hours   | /                                                                    | 1         |
| Biomimetic scaffold                        | Asymmetric | 81                 | 1                                      | 1400 cycles | ~99.27 (45 <sup>th</sup> cycle)                                      | 2         |
| 3D thin film                               | Symmetric  | 54                 | 0.3                                    | /           | /                                                                    | 3         |
| Pyrolytic carbon nanotube forest           | Symmetric  | ~50                | 0.5                                    | 1000 hours  | /                                                                    | 4         |
| Porous Al                                  | Symmetric  | ~180               | 3                                      | 100 hours   | /                                                                    | 5         |
| Nanoporous carbon                          | Symmetric  | ~65                | 1                                      | 1000 hours  | /                                                                    | 6         |
| Au nanosheets                              | Asymmetric | ~100               | 1                                      | 500 cycles  | ~96% (10 <sup>th</sup> cycle);<br>~99.2% (300 <sup>th</sup> cycle)   | 7         |
| N doped carbon rod array                   | Symmetric  | ~50                | 0.5                                    | 240 hours   | /                                                                    | 8         |
| Pt ultrathin aluminophilic interface layer | Asymmetric | 109.4              | 1                                      | 550 hours   | ~98.6% (10 <sup>th</sup> cycle);<br>~99.6% (100 <sup>th</sup> cycle) | 9         |
| Graphite coating Al                        | Symmetric  | 43                 | 0.4                                    | 400 hours   | /                                                                    | This work |
|                                            | Asymmetric | 35                 | 0.4                                    | 250 cycles  | ~95.7% (10 <sup>th</sup> cycle)<br>~99.4% (200 <sup>th</sup> cycle)  |           |

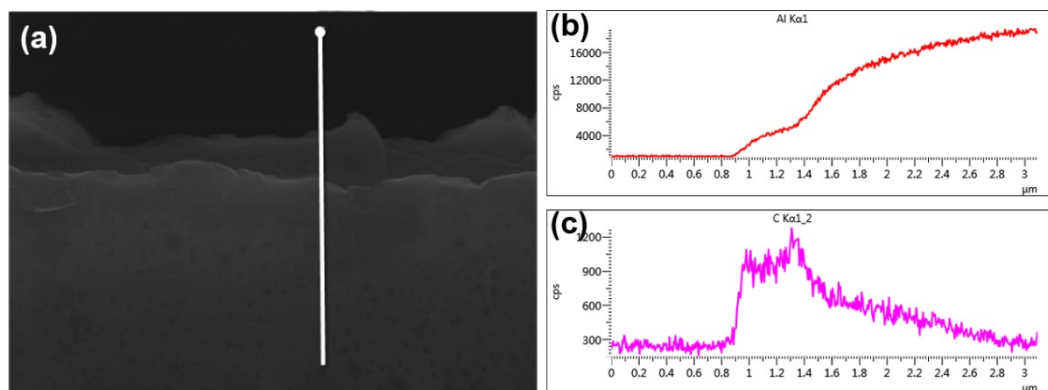

**Figure S1.** EDS line scan of Al-g. (a) The cross viewed SEM image. (b and c) Intensities of Al (b) and C (c) along the arrow in (a).

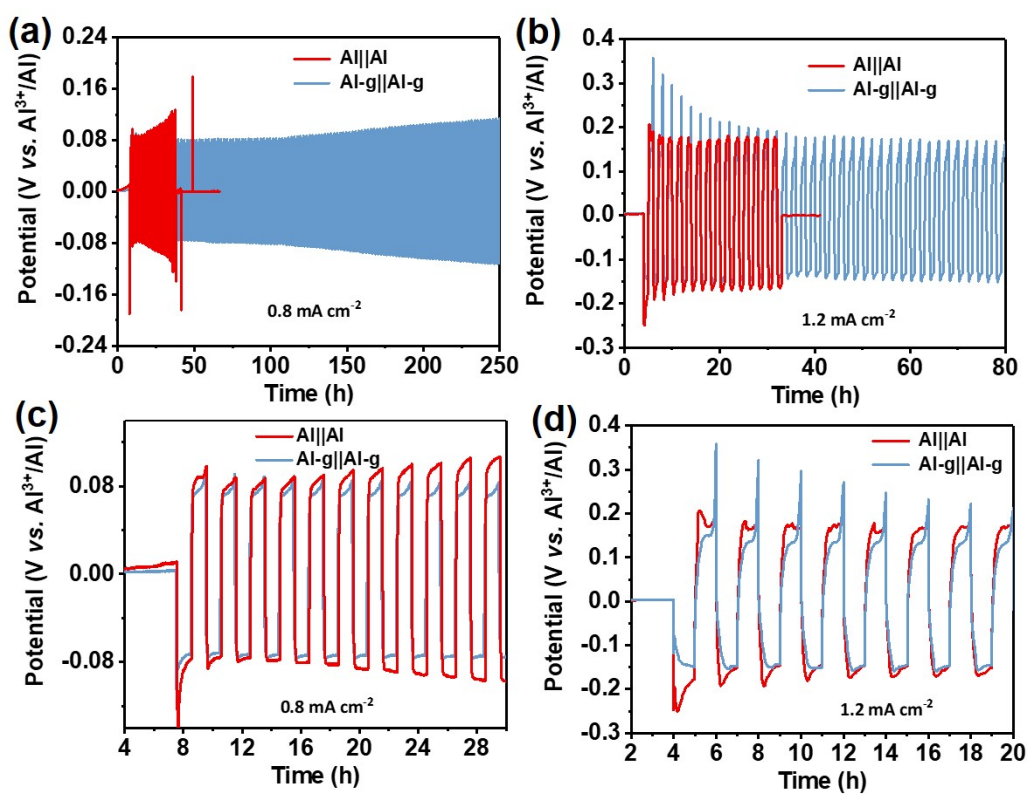

**Figure S2.** (a and b) Electrochemical cycling performances of symmetric Al||Al and Al-g||Al-g cells at (a) 0.8 and (b) 1.2 mA cm<sup>-2</sup>. The Al plating/stripping processes maintained at 1 h. (c) Magnified profile of (a). (d) Magnified profile of (b).

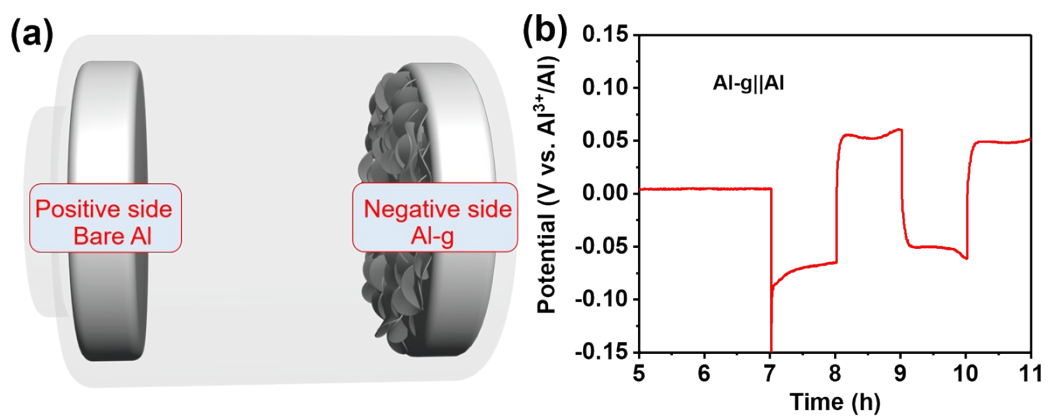

**Figure S3.** (a) Schematic illustration of Al-g||Al configuration and (b) the corresponding voltage-time profile.

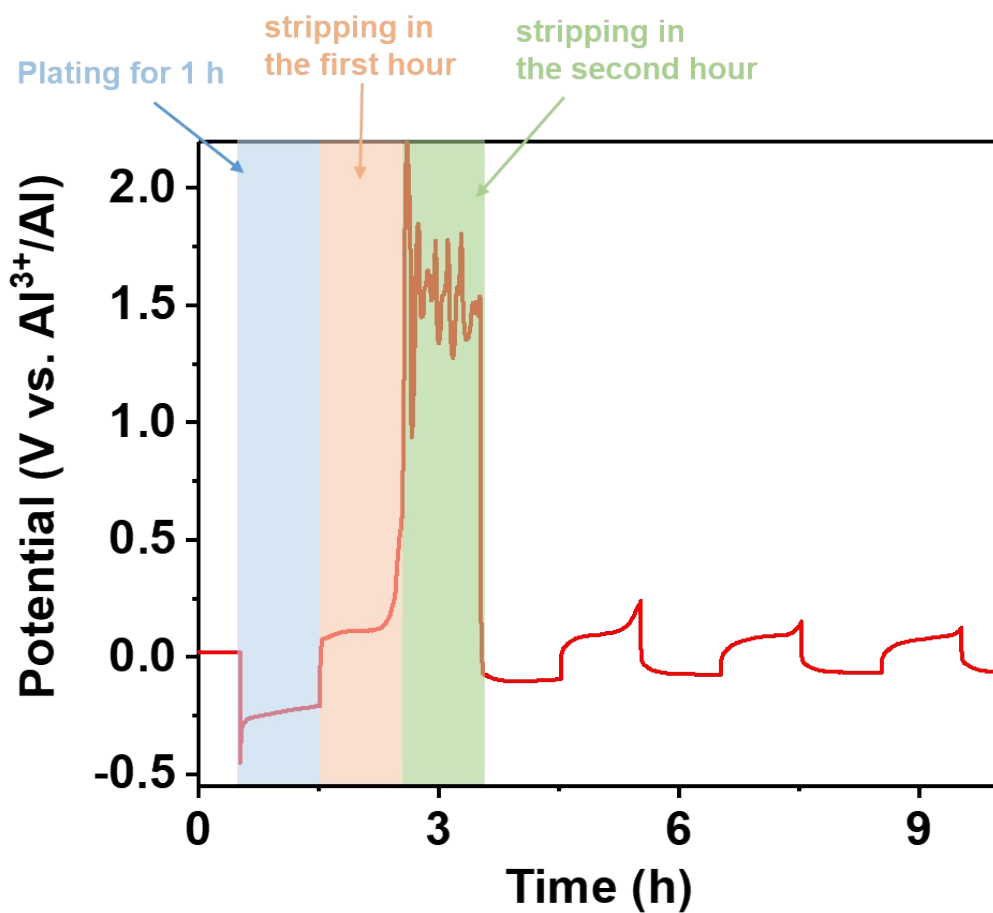

**Figure S4.** The voltage-time profile of Al||Al-g cell with negative bias for 1 h and positive bias for 2 h in the first cycle.

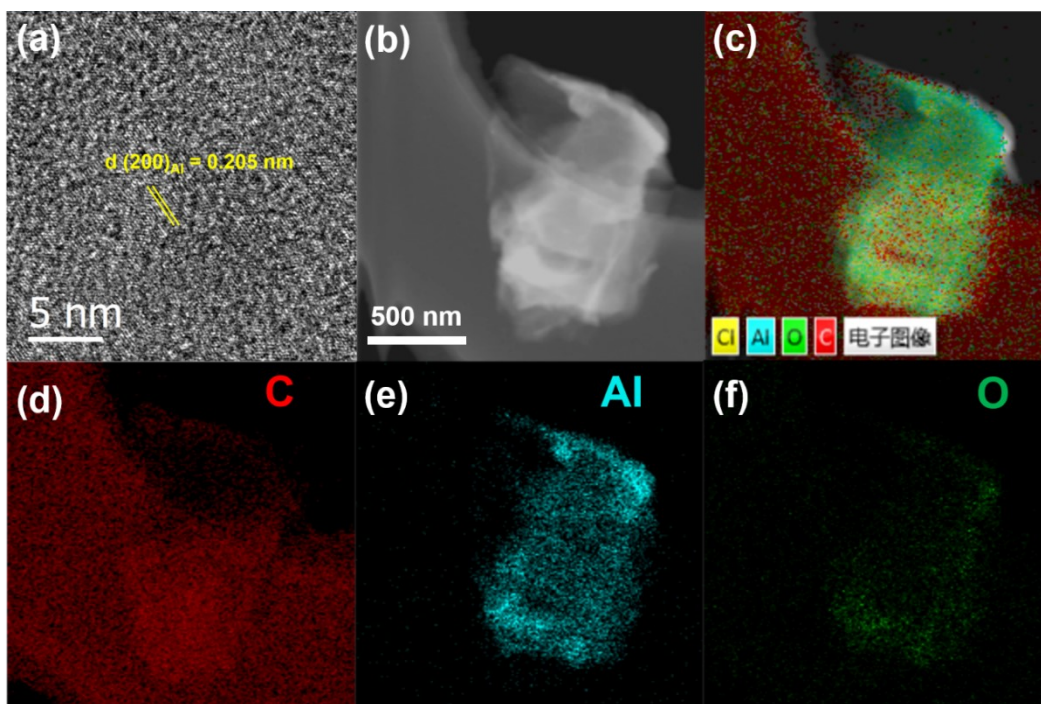

**Figure S5.** (a) High resolution TEM image, and (b) STEM image of the cycled Al-g. (c-f) EDS mapping of the cycled Al-g.

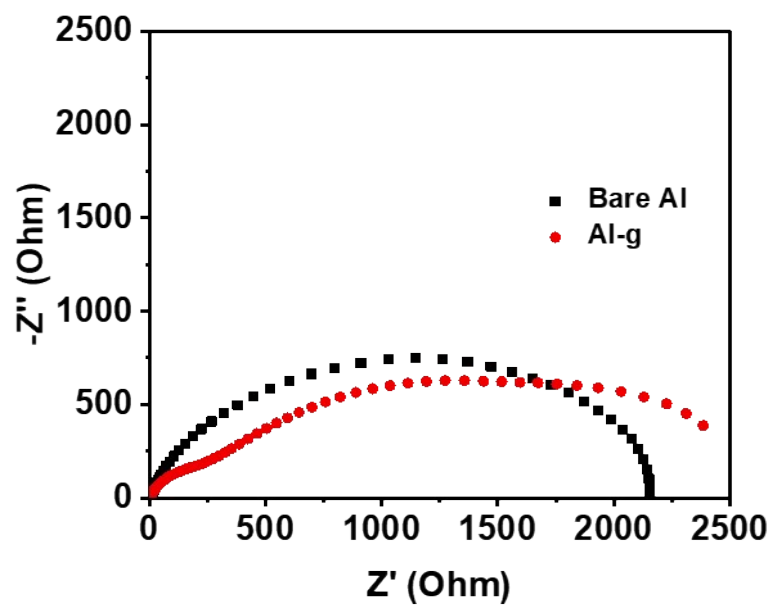

**Figure S6.** EIS of the symmetric cell with bare Al and Al-g electrodes.



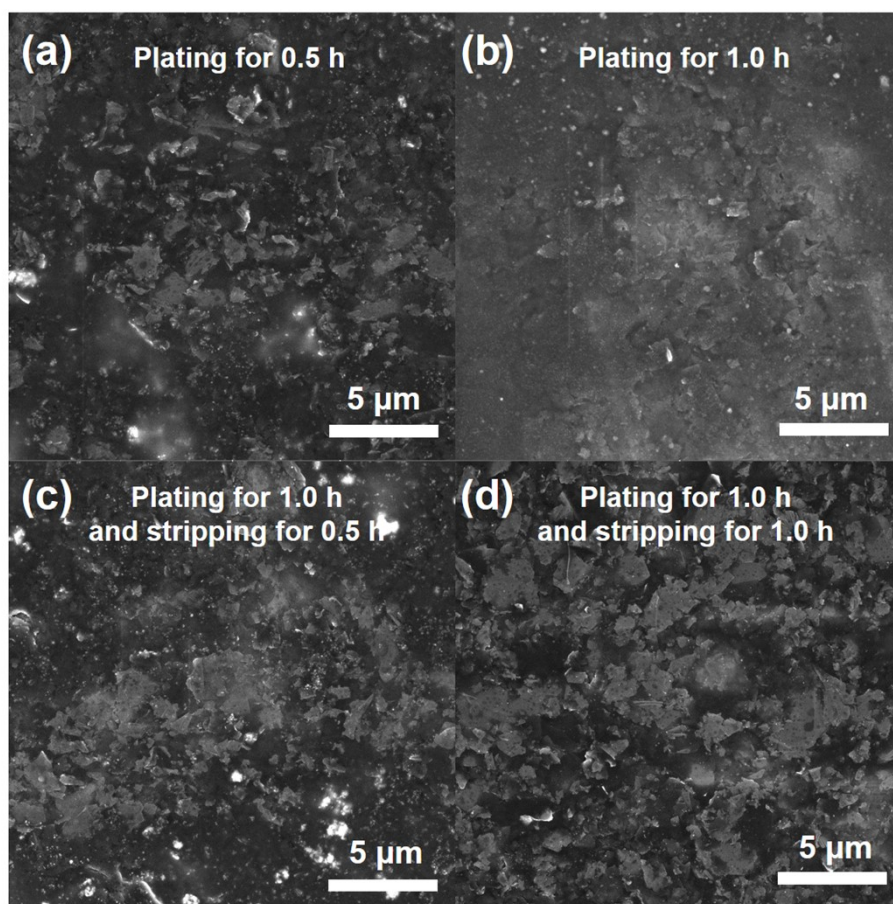

**Figure S7.** SEM images of the Al-g electrodes after (a) plating for 0.5 h, (b) plating for 1.0 h, (c) plating for 1.0 h and stripping for 0.5 h, and (d) plating for 1.0 h and stripping for 1.0 h.

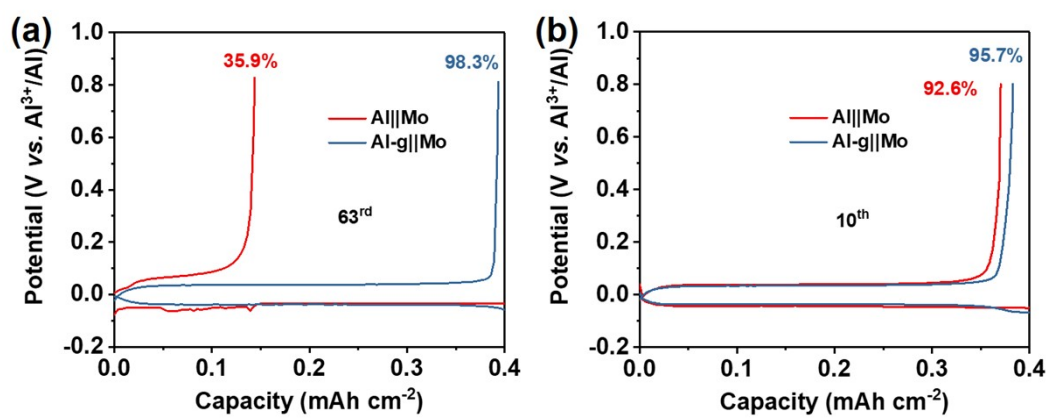

**Figure S8.** Al plating/stripping voltage profiles from (a) the 63<sup>rd</sup> and (b) the 10<sup>th</sup> cycle shown for the Al-g anode and bare Al anode at  $0.4 \text{ mA cm}^{-2}$ .

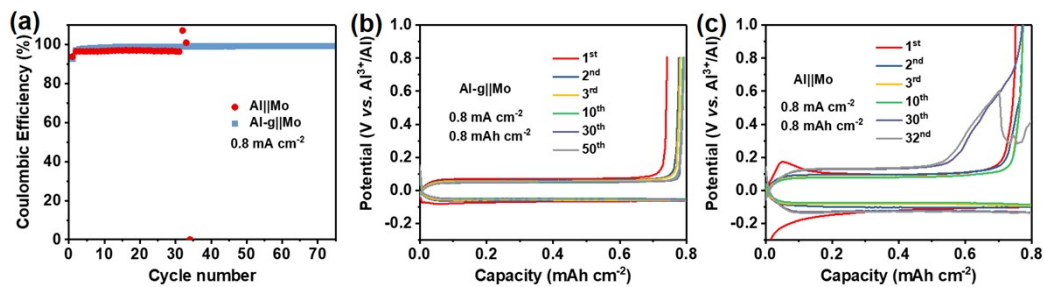

**Figure S9.** (a) CEs comparison of Al plating on Mo mesh at  $0.8 \text{ mA cm}^{-2}$ . The amount of plated Al in each cycle is  $0.8 \text{ mAh cm}^{-2}$ . (b and c) Voltage profiles of the Al plating/stripping process of cells with (b) Al-g anode and (c) Al anode at  $0.8 \text{ mA cm}^{-2}$ .

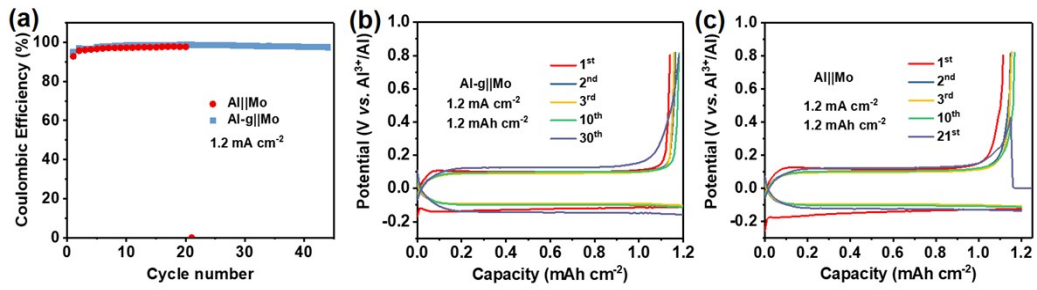

**Figure S10.** (a) CEs comparison of Al plating on Mo mesh at  $1.2 \text{ mA cm}^{-2}$ . The amount of plated Al in each cycle is  $1.2 \text{ mAh cm}^{-2}$ . (b and c) Voltage profiles of the Al plating/stripping process of cells with (b) Al-g anode and (c) Al anode at  $1.2 \text{ mA cm}^{-2}$ .

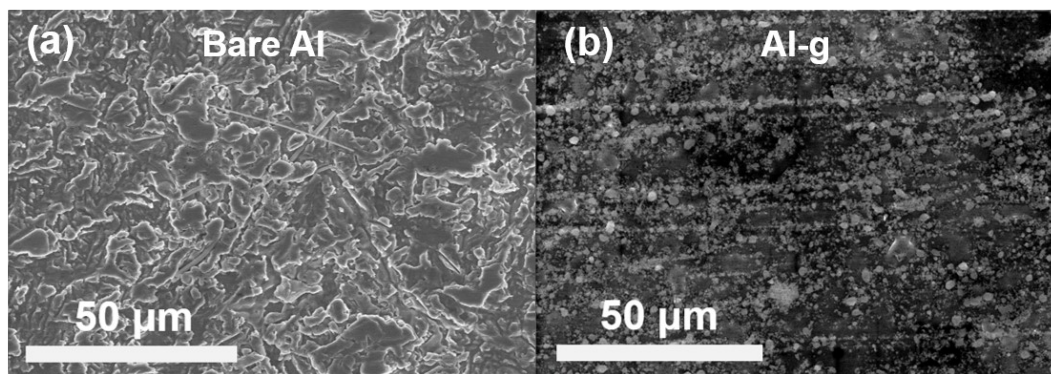

**Figure S11.** Low-magnification SEM images of (a) bare Al and (b) Al-g electrode after cycling in the corresponding symmetric cells.

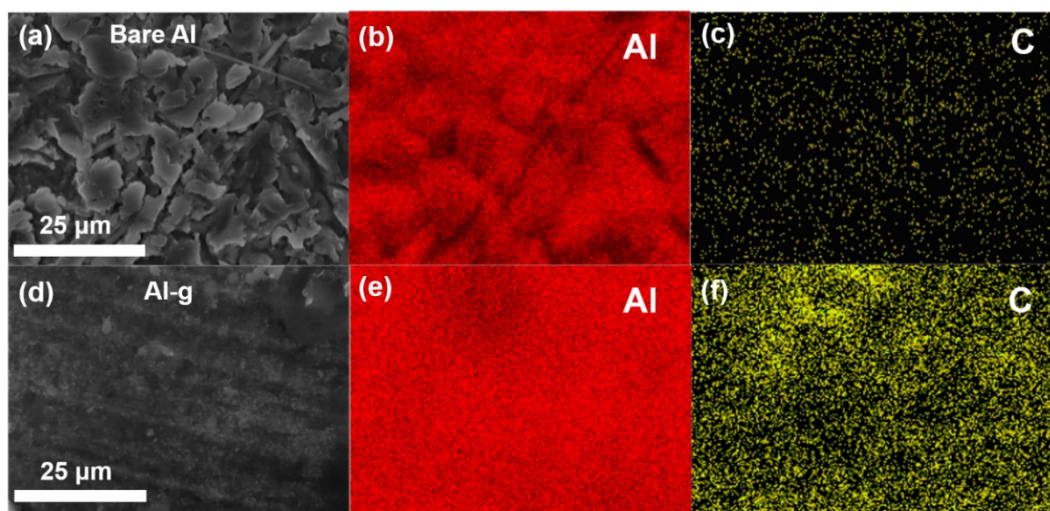

**Figure S12.** SEM images and corresponding EDS maps of cycled (a-c) bare Al and (d-f) Al-g in the corresponding symmetric cells.

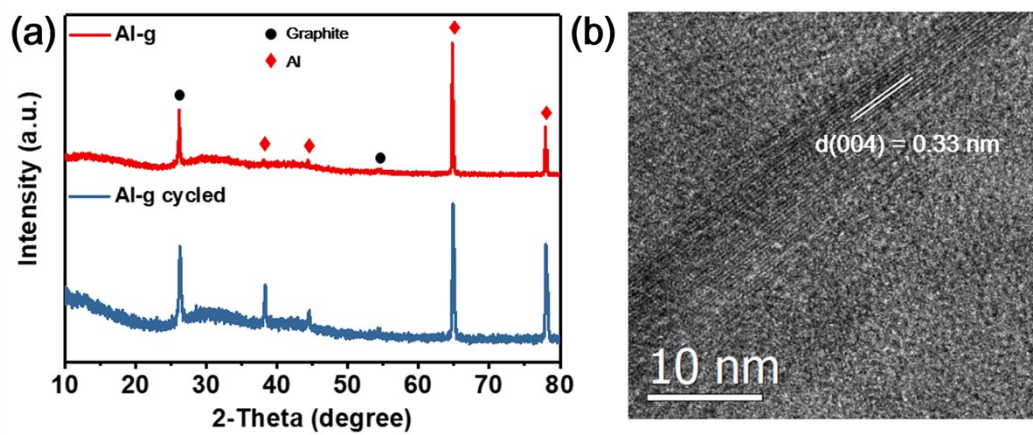

**Figure S13.** (a) XRD patterns of Al-g electrode before and after cycling. (b) HRTEM image of the Al-g electrode after cycling in symmetric cell.

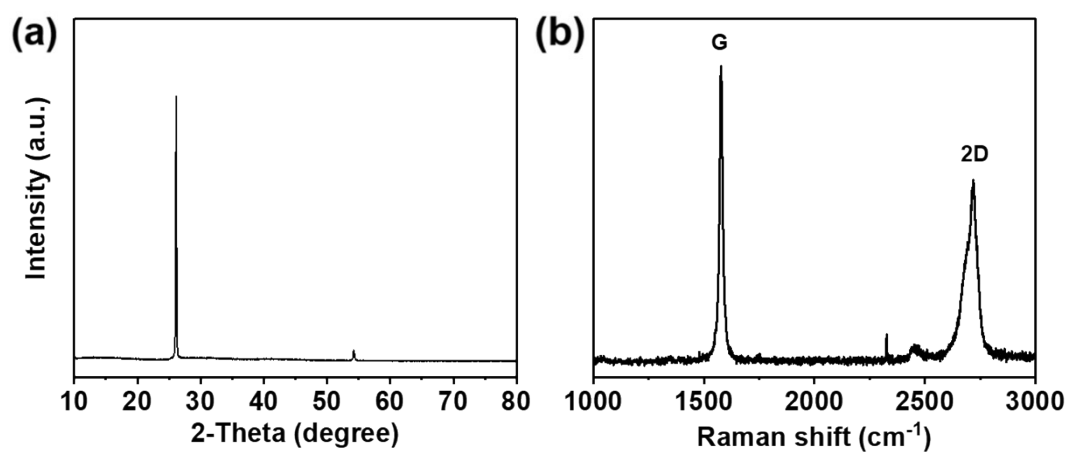

**Figure S14.** (a) XRD pattern and (b) Raman spectrum of the graphite cathode materials.



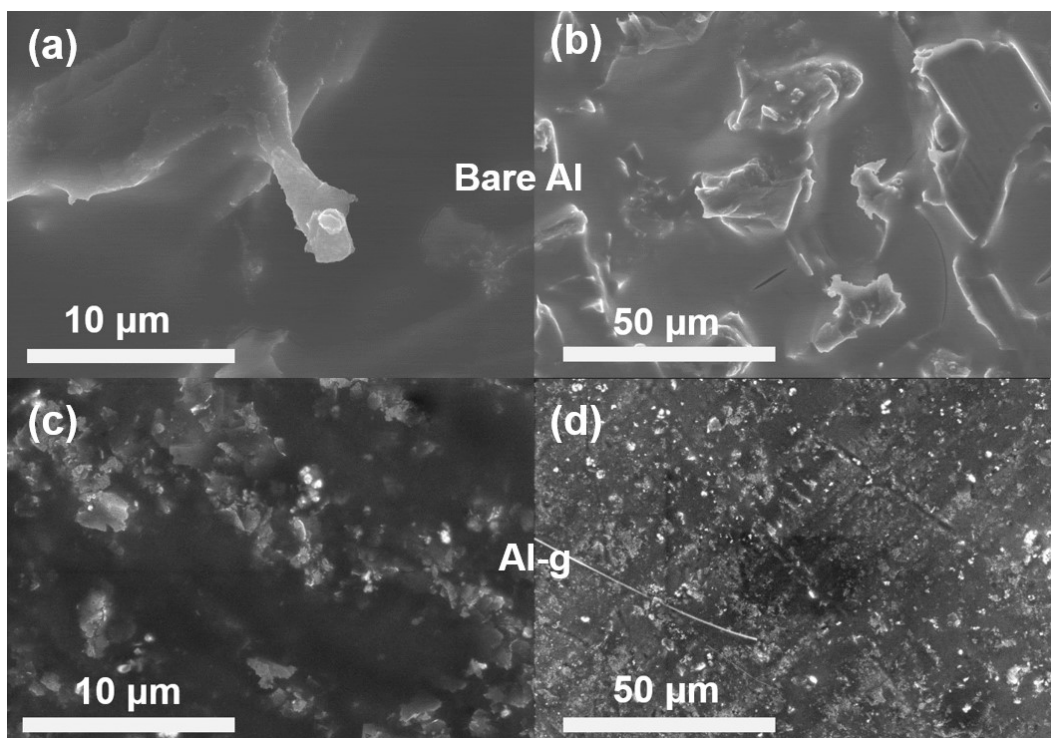

**Figure S15.** (a and c) Low-magnification and (b and d) high-magnification SEM images of (a and b) bare Al and (c and d) Al-g electrode after cycling in the corresponding Al||graphite and Al-g||graphite batteries.

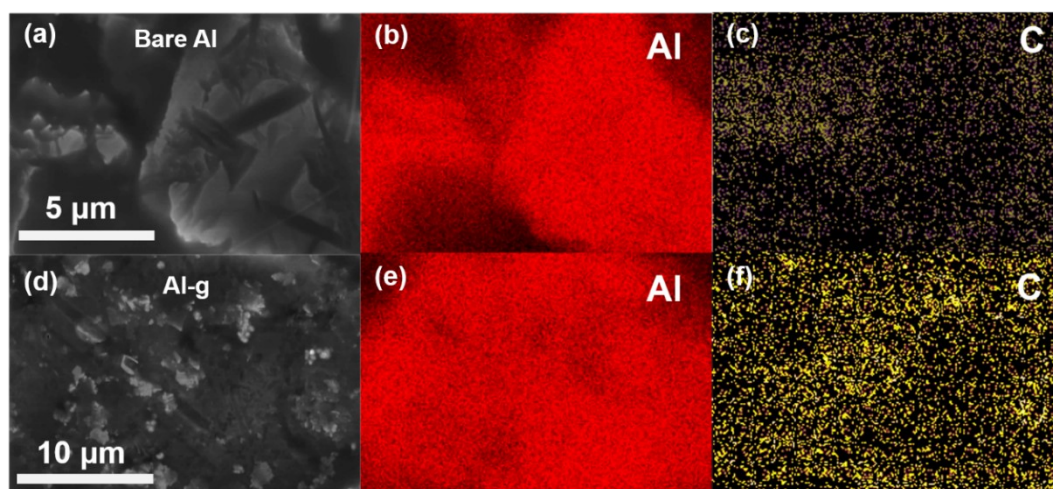

**Figure S16.** SEM images and corresponding EDS maps of cycled (a-c) bare Al and (d-f) Al-g from Al||graphite and Al-g||graphite dual-ion batteries, respectively.

## References

- 1 J. Li, K. S. Hui, S. Ji, C. Zha, C. Yuan, S. Wu, F. Bin, X. Fan, F. Chen, Z. Shao and K. N. Hui, *Carbon Energy*, 2022, **4**, 155-169.
- 2 Z. Zhang, X. Yang, P. Li, Y. Wang, X. Zhao, J. Safaei, H. Tian, D. Zhou, B. Li, F. Kang and G. Wang, *Adv. Mater.*, 2022, **34**, e2206970.
- 3 N. Lindahl, J. Bitenc, R. Dominko and P. Johansson, *Adv. Funct. Mater.*, 2020, **30**, 2004573.
- 4 S. Ha, J. C. Hyun, J. H. Kwak, H.-D. Lim, B. S. Youn, S. Cho, H.-J. Jin, H.-K. Lim, S. M. Lee and Y. S. Yun, *Chem. Eng. J.*, 2022, **437**, 135416.
- 5 Y. Long, H. Li, M. Ye, Z. Chen, Z. Wang, Y. Tao, Z. Weng, S. Qiao and Q.-H. Yang, *Energy Storage Mater.*, 2021, **34**, 194-202.
- 6 J. Yoon, S. Moon, S. Ha, H.-K. Lim, H.-J. Jin and Y. S. Yun, *J. Energy Chem.*, 2022, **74**, 121-127.
- 7 Q. Zhao, J. Zheng, Y. Deng and L. Archer, *J. Mater. Chem. A*, 2020, **8**, 23231-23238.
- 8 H. Jiao, S. Jiao, W.-L. Song, X. Xiao, D. She, N. Li, H. Chen, J. Tu, M. Wang and D. Fang, *Nano Res.*, 2021, **14**, 646-653.
- 9 Y. Meng, M. Wang, K. Li, Z. Zhu, Z. Liu, T. Jiang, X. Zheng, K. Zhang, W. Wang, Q. Peng, Z. Xie, Y. Wang and W. Chen, *Nano Lett.*, 2023, **23**, 2295-2303.
